# Supplementary material
Source: MDPI journal article supplement (https://www.mdpi.com/2077-0472/11/10/909)
Supplement: s1 [file s1]

Supplementary Materials

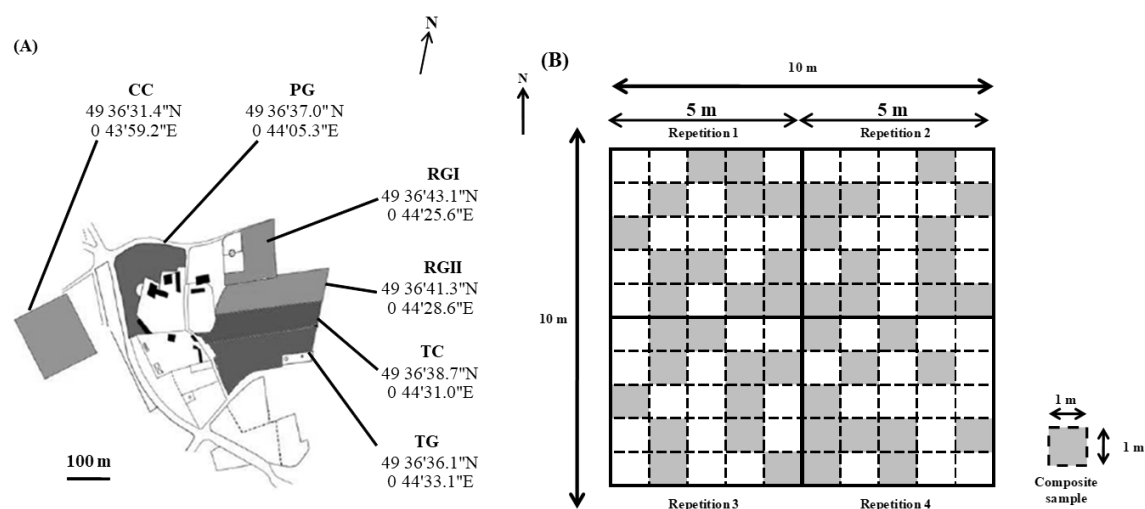

Figure S1. Plots positions in the area of the study (A) and sampling protocol (B).

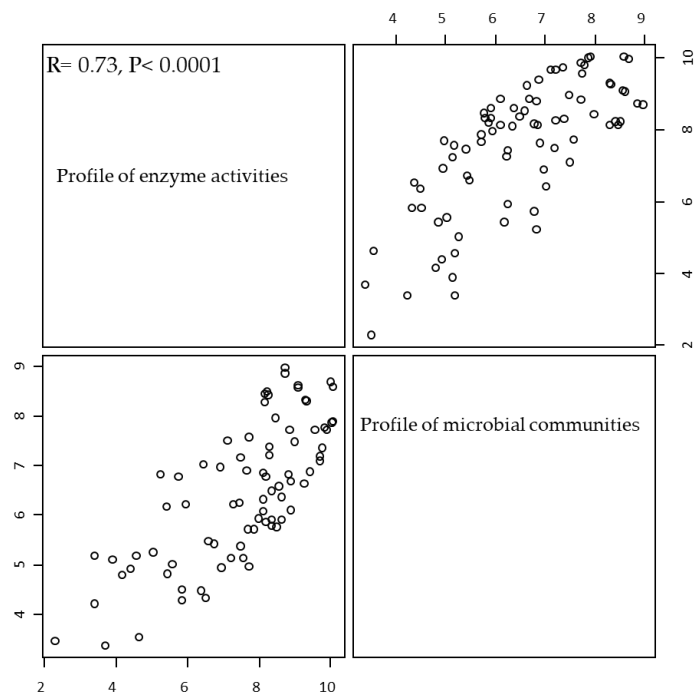

Figure S2. Correlation between microbial abundance and enzyme activities profiles

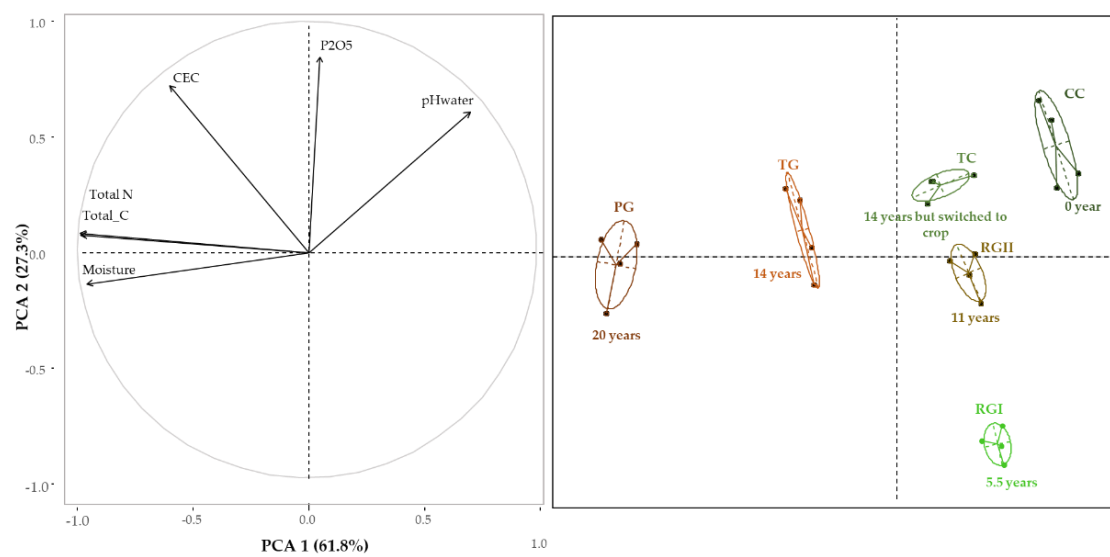

**Figure S3.** Principal component analysis and correlation circle of plots physicochemical

**Table S1.** Physicochemical characteristics explaining the variation of the abundance of microbial communities and enzyme activities by multiple regression analysis

|                                                   | Total C                  | Total N                  | pH <sub>water</sub>      | CEC                      | P <sub>2</sub> O <sub>5</sub> | Full model <sup>1</sup> |                |
|---------------------------------------------------|--------------------------|--------------------------|--------------------------|--------------------------|-------------------------------|-------------------------|----------------|
|                                                   | <i>P</i><br><i>value</i> | <i>P</i><br><i>value</i> | <i>P</i><br><i>value</i> | <i>P</i><br><i>value</i> | <i>P value</i>                | (R) %                   | <i>P value</i> |
| Microbial communities                             |                          |                          |                          |                          |                               |                         |                |
| Total dsDNA (µg g <sup>-1</sup> )                 | <0.01                    | ns                       | ns                       | ns                       | ns                            | 68                      | <0.0001        |
| Total microbial PLFA (nmol g <sup>-1</sup> )      | ns                       | ns                       | ns                       | ns                       | ns                            | 87                      | <0.0001        |
| Microbial biomass carbon (mg C Kg <sup>-1</sup> ) | ns                       | ns                       | ns                       | ns                       | ns                            | 97                      | <0.0001        |
| Bacterial dsDNA (µg g <sup>-1</sup> )             | ns                       | ns                       | ns                       | ns                       | ns                            | 58                      | <0.001         |
| Total bacterial PLFA (nmol g <sup>-1</sup> )      | ns                       | ns                       | ns                       | ns                       | ns                            | 87                      | <0.001         |
| Fungal dsDNA (µg g <sup>-1</sup> )                | <0.01                    | <0.001                   | <0.01                    | <0.01                    | <0.01                         | 55                      | <0.0001        |
| Total fungal PLFA (nmol g <sup>-1</sup> )         | <0.01                    | ns                       | ns                       | ns                       | ns                            | 82                      | <0.0001        |
| Total ergosterol (µg g <sup>-1</sup> )            | ns                       | ns                       | <0.01                    | ns                       | ns                            | 71                      | <0.0001        |
| Free ergosterol (µg g <sup>-1</sup> )             | <0.01                    | ns                       | ns                       | ns                       | ns                            | 72                      | <0.0001        |
| Global enzymes                                    |                          |                          |                          |                          |                               |                         | <0.0001        |
| DEH                                               | ns                       | ns                       | ns                       | ns                       | ns                            | 71                      | <0.0001        |
| FDA                                               | <0.01                    | <0.01                    | ns                       | ns                       | <0.01                         | 68                      | <0.0001        |
| C cycle enzymes                                   |                          |                          |                          |                          |                               |                         | <0.0001        |
| GAL                                               | <0.05                    | ns                       | <0.01                    | ns                       | ns                            | 94                      | <0.0001        |
| GLU                                               | ns                       | ns                       | <0.01                    | <0.05                    | <0.05                         | 76                      | <0.0001        |
| CEL                                               | ns                       | ns                       | <0.001                   | ns                       | ns                            | 88                      | <0.0001        |
| LAC                                               | ns                       | ns                       | ns                       | ns                       | ns                            | 64                      | <0.0001        |
| LIP                                               | <0.05                    | ns                       | ns                       | ns                       | <0.01                         | 91                      | <0.0001        |
| XYL                                               | ns                       | ns                       | ns                       | ns                       | ns                            | 91                      | <0.0001        |
| N cycle enzymes                                   |                          |                          |                          |                          |                               |                         | <0.0001        |
| ARYLN                                             | ns                       | ns                       | <0.05                    | ns                       | ns                            | 78                      | <0.0001        |
| NAG                                               | ns                       | ns                       | <0.01                    | ns                       | ns                            | 91                      | <0.0001        |
| URE                                               | ns                       | ns                       | <0.05                    | ns                       | ns                            | 96                      | <0.0001        |
| S cycle enzyme                                    |                          |                          |                          |                          |                               |                         | <0.0001        |
| ARYLS                                             | <0.01                    | <0.05                    | <0.0001                  | ns                       | ns                            | 98                      | <0.0001        |
| P cycle enzymes                                   |                          |                          |                          |                          |                               |                         | <0.0001        |
| ACP                                               | <0.001                   | ns                       | ns                       | ns                       | ns                            | 93                      | <0.0001        |
| AKP                                               | <0.05                    | <0.05                    | ns                       | ns                       | ns                            | 35                      | >0.05          |

<sup>1</sup>Full model include all physicochemical characteristics (total C, total N, pH<sub>water</sub>, CEC, P<sub>2</sub>O<sub>5</sub>) as explicative variables; ns : indicates not significant
